# Supplementary figures and images for: Antitumor Activity of Rapamycin in a Phase I Trial for Patients with Recurrent PTEN-Deficient Glioblastoma
Source: PLOS journal article supplement (doi:10.1371/journal.pmed.0050008), 2008-01-16

## Supplementary Figure 1

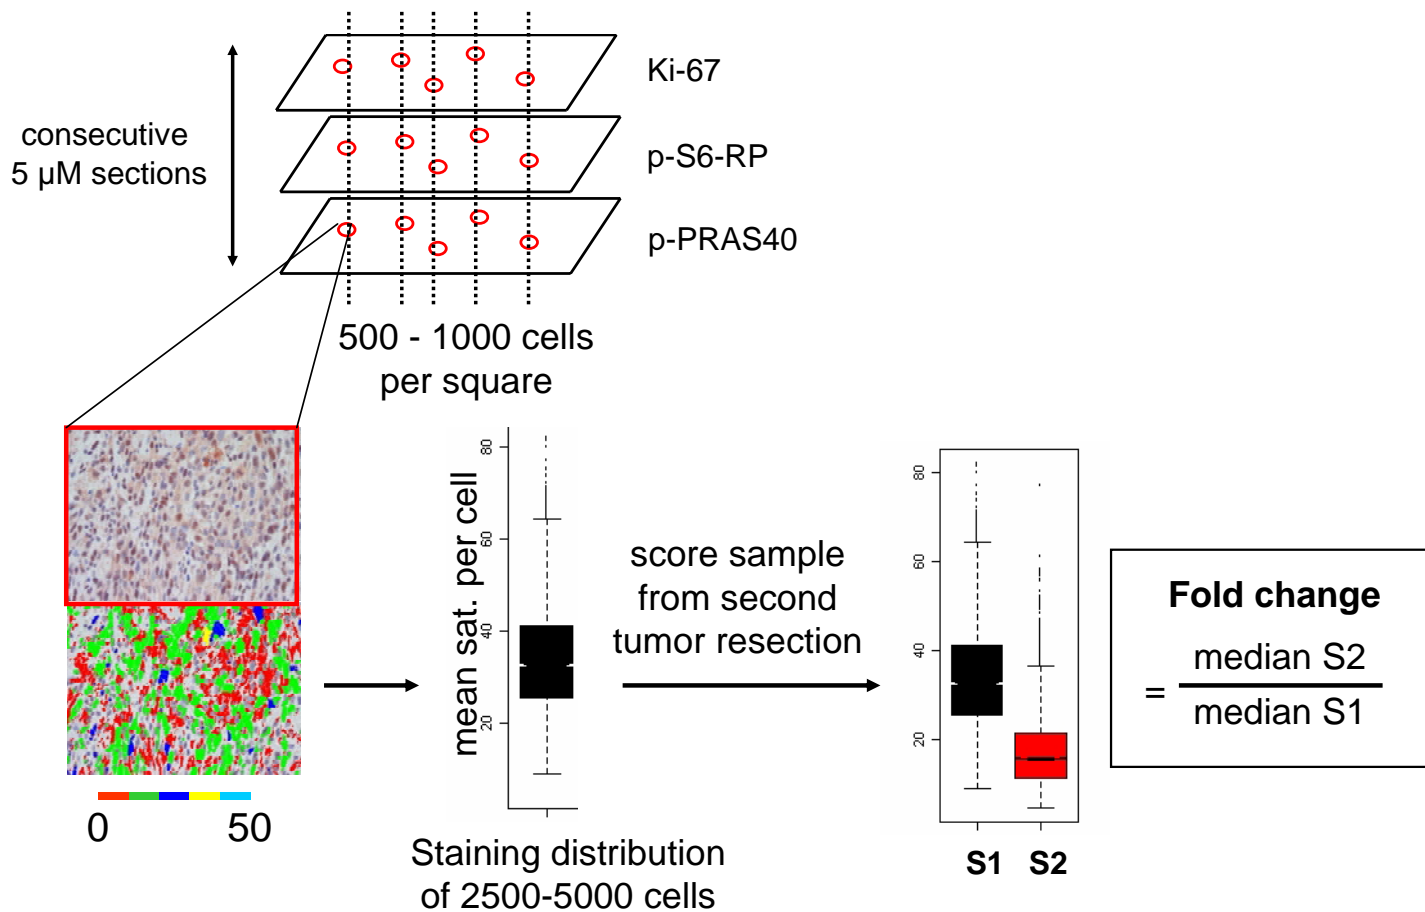

Supplement: S1 (10.1371/journal.pmed.0050008.s001) [file journal.pmed.0050008.s001]

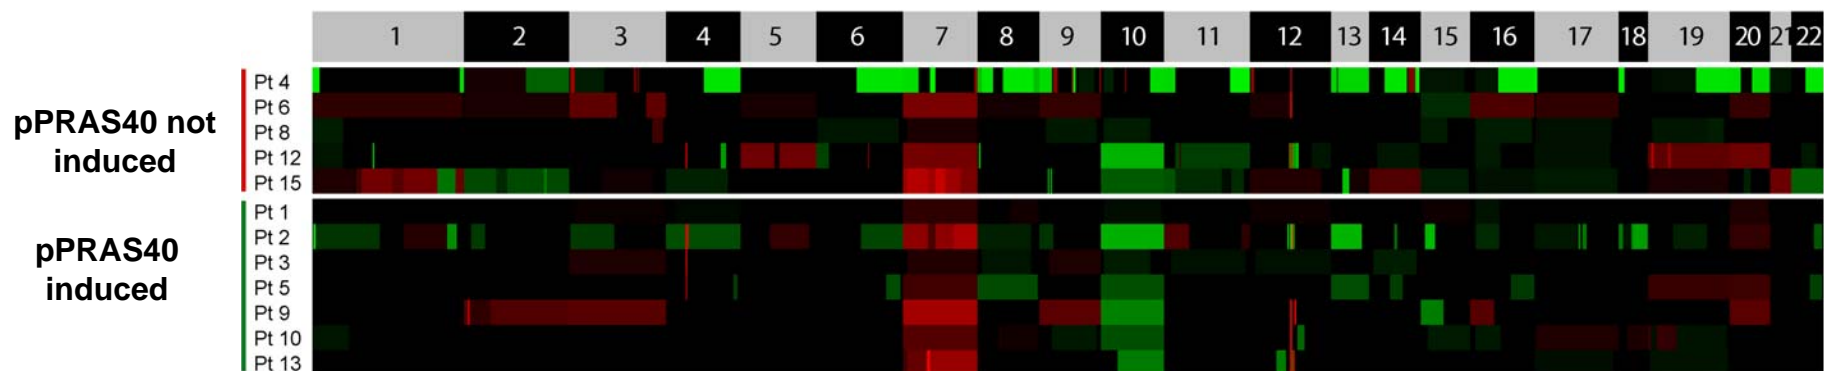

Supplement: S6 (10.1371/journal.pmed.0050008.s006) [file journal.pmed.0050008.s006]
